# Supplementary material for: Parenting among Settled Migrants from Southern Africa: A Qualitative Evidence Synthesis
Source: Springer Nature journal article supplement (doi:10.1007/s10826-021-02013-2), 2021-07-06
Supplement: MOESM2 [file 19338022]

**Figure 1A**

***Overview of the thematic synthesis***

Descriptive themes Analytic themes
